# Supplementary material for: siRNA-Mediated Simultaneous Regulation of the Cellular Innate Immune Response and Human Respiratory Syncytial Virus Replication
Source: PubMed Central journal article supplement (PMC6572644; doi:10.3390/biom9050165), 2019-04-28
Supplement: biomolecules-09-00165-s001.pdf [file biomolecules-09-00165-s001.pdf]

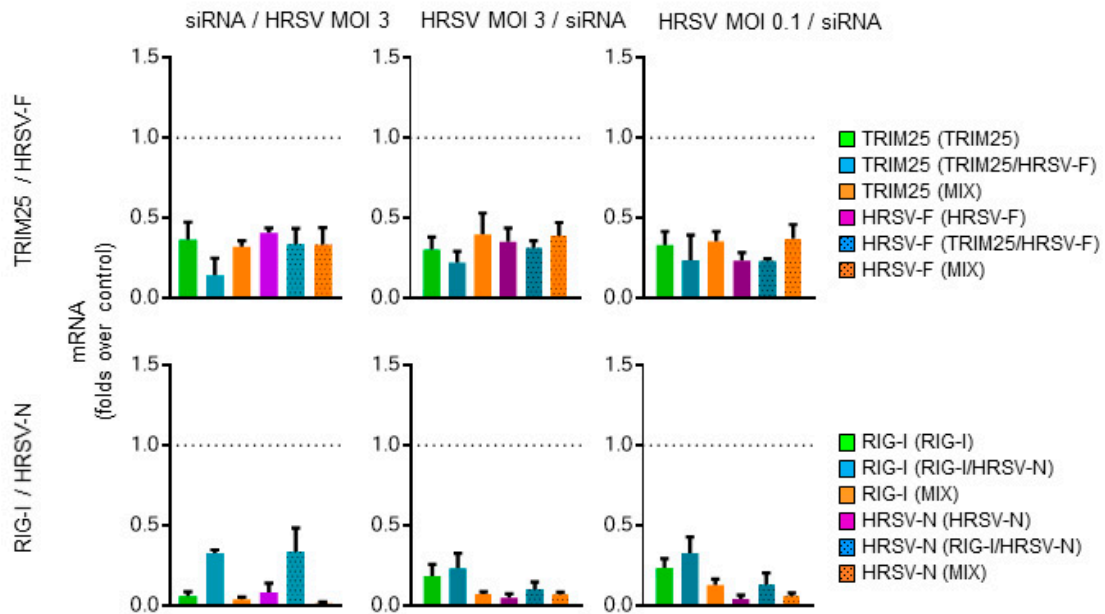

**Supplemental Figure 1a.** Relative levels of TRIM25 or HRSV-F (upper panel) and RIG-I or HRSV-N (lower panel) in cells silenced with the siRNAs shown in parenthesis. Levels of mRNAs were quantified by qRT-PCR at 48 h post-transfection and represented as folds over mRNAs expressed in cells transfected with a control siRNA. Data represent the mean and standard deviation from three independent experiments.

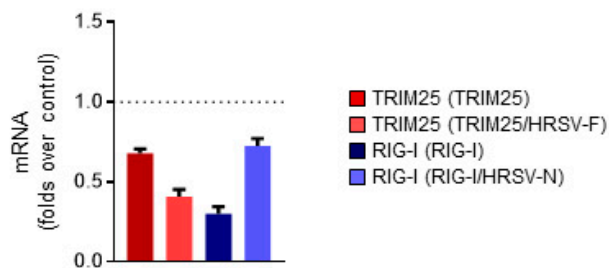

**Supplemental Figure 1b.** Relative levels of TRIM25 or RIG-I in cells silenced with the siRNAs shown in parenthesis. Levels of mRNAs were quantified by qRT-PCR at 24 h post-transfection (before infection) and represented as folds over mRNAs expressed in cells transfected with a control siRNA. Data represent the mean and standard deviation from triplicate transfections.

### CDS TRIM25

ATGGCAGAGCTGTGCCCCCTGGCCGAGGAGCTGTCGTCTCCATCTGCTGGAGCCCTCAAGGAGCCGGTACCACCTCCGTGGGCCACAACCTCTGCGGGTCTGTCCTGAATGAGACGTGGGCGAGTCCAGGGCTCGCCATCCTGTGCCCGCAGTCCCGCGCCGTCTACCAGGCGCACCCGAGCTGCACAAGAACACGGTCTGTGCAACCTGGTGGAGCAGTCTCTGAGGCGGACCTGGCCGGGAGCCACCCGCGCAGCTGTGACGCGCCCGCCCGCCTCTGACCCAGCCGGAATGCCAGGTGGCCTGCGACCACTGCTGAAGGAGCCCGCTGAAGACGTGTTGGTGTGATGCTCTCTGTGAGGAGCAGCTGCAGCCGCACTTGCAGAGCCCGCCTCCAGGAGCCCGCTGCAGCCCGCTGCGGACCTGTTGCGCCGCAAAATGTTCCAGCACAATCGGCTGCGGGAATTTTTCTGCCCGAGCAGCAGTGCATCTGCCACATCTGCTGGTGGAGCATAAGACCTGCTCTCCGCGTCCCTGAGCCAGGCCAGCGCCGACCTGGAGGCCACCTGAGGCACAACTAACTGTGATGTACAGTCAAGTCAACGGGCGTGCAGAGCACTGGATGATGTGAGAAACAGGCAGCAGGATGTGCGGATGACTGCAAACAGAAAGTGGAGCAGCTAACAAGAATACACGGAAATGAAGGCTCTTTGGAGCCCTCAGAGACCCTCGACAAGGAGATAAAGGAAGAGGAGAAGAGGGTCAACAGCAAGTTGACACCTTTATCAGATTCTCTCAAGAAGAAGAGTGAATCCAGACCTTGAAGGAGGATTGAACAGAGCCTGACCAAGAGGGATGAGTTGAGTTCTGAGAAAGCATCAAACCTGCGAGGAATCTCAACAAAGCCAGTCTACATCCCGAGGTGGAAGTGAACCAAGCTGATAAAAGGCATCCAGAGCAACATAACCTGACCTCAAAACGAGTGAAGCAGTGCATCGGGCGCTCCAGGAGCCACCCCAAGTTCAGGTGACCTGGAGAGCATGACCCAGCTCCACACACAATCCACACGCCCTGTGAAGAAGTCTCAAAGAGGAAAGAAATCAAAGAACTCCCTGCTCCCTGCTTACCAGCAAGCTTCCACGTTTGGAGCCCGGAACA GTTAGTGGATTTAAACAAGCTGGCTTGGAGGCTGCAGCCAAAGCCAGCTCACATCCGAACTCAACATCTCTCAAGCCAAAGTGTGGAGACCTTCTGGCAAGTCCAGACCTGAGCTCTGGAGTATTACATTAAGTATCTGGACTACAACCCGCCACAACAAGTGGCTGTGTCAGAGTGTATACAGTAGCTTCTGTGGCTGAGATGCTCAGAACTACCGCCGCATCCCAAGAGTTCACATACTGCTCTCAGGTGCTGGGCTGCAGTGTACAAGAAAGGGATCCACTACTGGAGGTGGAGCTGCAGAAGAACAACCTCTGTGGGTAGGACTGCTACGGAAGCATGAACCGGCAAGGCCAGAAAGCAGGCTCGGCCGCAACAGCCCTCTGGTGGAGTGGTTCACACCAAGATCTCTGCTGGCACAATGCTGCGGAGAAACCCCTGCCCTCCACCAAGGCCAGCGGTGGGCTCTCAAC TGTGACCAGGCTTTGTCATCTTCTGCTGTTGCCACAAGTCCACCTGATGTATAAGTTCAGGGTGGACTTACTGAGGCTTTGACCCGCTTTCTGGGTA TTTTCTGCTGGTCCACACTCTCATCTGCTCCCAAGTAGGCAAGCT

### CDS HRSV-F

ATGGAGTTGCCAATCTCAAAGCAAATGCAATTACCACAATCCTCGCTGCAGTCAACATTTTGCTTTGCTTCTAGTCAAACATCACTGAAGAAATTTTATCA ATCAACATGCAGTGCAGTTAGCAAAGCTATCTTAGTCTTAAGGACTGGTTGGTATACTAGTGTATAACTATAGAATTAAGTAATATCAAGGAAAA TAAGTGTAAATGGAACAGATGCCAAGGTAATACTGATAAAACAAGAATTAGATAAATAAAAAATGCTGAACAGAATTGCAGTTGCTCATGCAAAGCA CACCAGCAGCAAACAATCGAGCCAGAGAGAATACCAAGTTTTAGAAATATACACTCAACAATACCAAAAAACCAATGTAACATTAAGCAAGAAA AGGAAAAAGAAGATTTCTTGGTTTTTGTAGGTGTTGGATCTGCAATCGCCAGTGGCACTGCTGTATCTAAGTCTGCACTTAGAAGGAGAAGTGAAC AAGATCAAAAAGTCTACTATCCACAACAAGGCCGTAGTCAGTTTCAAATGGAGTGTAGTGTCTTAACCAAGCAAAAGTGTAGACTCAAAAACTAT ATAGATAAAACAATTGTTACCTATTGTAATAAGCAAAGCTGCAGAATATCAAATATAGAACTGTGATAGAGTTCAAACAAAAGAAACAAGACTACT AGAGATTACAGGGAAATTTAGTGTAAATGCAGGTGTAACACTGTAAGCACTTACATGTTAACTAATAGTAAATTTATGTCATTAATCAATGATATG CCTATAACAATGATCAGAAAAAGTAAATGTCCAACAATGTTCAAATAGTTAGACAGCAAAGTACTCTATCATGTCCATAATAAAGAGGAAAGTCTTA GCATATGTAGTACAATTAACACTATATGGTGTGATAGATACACCTTGTGGAAATTAACACACATCCCTCTATGTACAACCAACAACAAGAAAGGGTCA AACATCTGTTTAAACAAGACTGACAGAGGATGGTACTGTGACAATGCAGGATCAGTATCTTTCTCCCAAGCTGAAACATGTAAGTTCAATCGAAT CGAGTATTTTGTGACACAATGAACAGTTTAAACATTACCAAGTGAAGTAACTCTGCAATGTTGACATATTAATCCCAATATGATTGTAATAATATGA CTTCAAAAACAGATGAAGCAGCTCCGTTATCACATCTTAGGAGCCATTGTGTCATGCTATGGCAAACTAAATGTACAGCACTCAATAAAAAATCGTG GAATCATAAAGACATTTCTAACGGGTGTGATTATGTATCAAATAAAGGGGTGGACACTGTGTCTGTAGGTAACACATTAATTTATGTAATAAGCAAG AAGGCAAAAGTCTCTATGTAAGGAGTGAACCAATAAATAATTTCTATGACCCATTAGTATCCCTCTGATGAATTTGATGCATCAATATCTCAAGTCAA TGAGAAGATTAACAGAGTTTAGCATTATTCGTAATCCGATGAATATTACATCATGTAATGCTGGTAAATCAACCACAATATCATGATAACTACT ATAAATATAGTATTAGTAATATTGTTATCATTAAATGCTGTTGGACTGCTCTATACTGTAAGGCCAGAAGCACACCAGTCACTAAGCAAGGATC AACCTAGTGGTATAAATAATATTGATTAGTAACTGAAT

### CDS HRSV-F

ATGGAGTTGCCAATCTCAAAGCAAATGCAATTACCACAATCCTCGCTGCAGTCAACATTTTGCTTTGCTTCTAGTCAAACATCACTGAAGAAATTTTATCA ATCAACATGCAGTGCAGTTAGCAAAGCTATCTTAGTCTTAAGGACTGGTTGGTATACTAGTGTATAACTATAGAATTAAGTAATATCAAGGAAAA TAAGTGTAAATGGAACAGATGCCAAGGTAATACTGATAAAACAAGAATTAGATAAATAAAAAATGCTGAACAGAATTGCAGTTGCTCATGCAAAGCA CACCAGCAGCAAACAATCGAGCCAGAGAGAATACCAAGTTTTAGAAATATACACTCAACAATACCAAAAAACCAATGTAACATTAAGCAAGAAA AGGAAAAAGAAGATTTCTTGGTTTTTGTAGGTGTTGGATCTGCAATCGCCAGTGGCACTGCTGTATCTAAGTCTGCACTTAGAAGGAGAAGTGAAC AAGATCAAAAAGTCTACTATCCACAACAAGGCCGTAGTCAGTTTCAAATGGAGTGTAGTGTCTTAACCAAGCAAAAGTGTAGACTCAAAAACTATA TAGATAAAACAATTTGTTACCTATTGTAATAAGCAAAGCTGCAGAATATCAAATATAGAACTGTGATAGAGTTCAAACAAAAGAAACAAGACTACTA GAGATTACAGGGAAATTTAGTGTAAATGCAGGTGTAACACTACCTGTAAGCACTTACATGTTAACTAATAGTAAATTTATGTCATTAATCAATGATATGC CTATAACAATGATCAGAAAAAGTAAATGTCCAACAATGTTCAAATAGTTAGACAGCAAAGTACTCTATCATGTCCATAATAAAGAGGAAAGTCTTAG CATATGTAGTACAATTAACACTATATGGTGTGATAGATACACCTTGTGGAAATTAACACACATCCCTCTATGTACAACCAACAACAAGAAAGGGTCAA ACATCTGTTTAAACAAGACTGACAGAGGATGGTACTGTGACAATGCAGGATCAGTATCTTTCTCCACAAGCTGAAACATGTAAAGTTCAATCGAATC GAGTATTTTGTGACACAATGAACAGTTTAAACATTACCAAGTGAAGTAACTCTGCAATGTTGACATATTAATCCCAATATGATTGTAATAATATGAC TTCAAAAAACAGATGAAGCAGCTCCGTTATCACATCTTAGGAGCCATTGTGTCATGCTATGGCAAACTAAATGTACAGCATCAATAAAAAATCGTGG AATCATAAAGACATTTTCTAACGGGTGTGATTATGTATCAAATAAAGGGGTGGACACTGTGTCTGTAGGTAACACATTAATTTATGTAATAAGCAAGA AGGCAAAAGTCTCTATGTAAGGAGTGAACCAATAAATAATTTCTATGACCCATTAGTATCCCTCTGATGAATTTGATGCATCAATATCTCAAGTCAA TGAGAAGATTAACAGAGTTTAGCATTATTCGTAATCCGATGAATATTACATCATGTAATGCTGGTAAATCAACCACAATATCATGATAACTACTA TAATATAGTATTAGTAATATTGTTATCATTAAATGCTGTTGGACTGCTCTATACTGTAAGGCCAGAAGCACACCAGTCACTAAGCAAGGATCA ACTGAGTGGTATAAATAATATTGATTAGTAACTGAAT

**Supplemental Figure 2.** Coding Sequences (CDS) of *TRIM25* and *HRSV-F* showing the target sequence of *TRIM25* (green) siRNA, *HRSV-F* siRNA (blue) and *TRIM25* / *HRSV-F* siRNA (red). Mismatches between target genes and the siRNA are in lowercase.



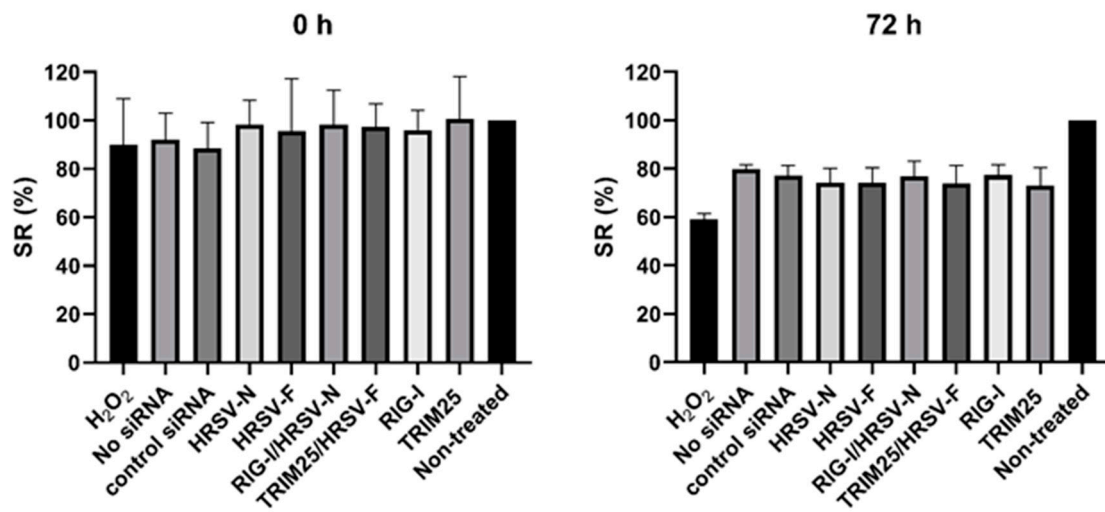

**Supplemental Figure 4.** Percentage of viable cells (survival rate, SR) transfected with the different siRNAs at 0 and 72 h post-transfection. Cell viability was determined by a MTT assay. Data represent the mean and standard deviation from quintuplicate transfections. A dilution of 1:2000 (from a 30% stock) of H<sub>2</sub>O<sub>2</sub> was used as a positive control of cell damage.
